# Supplementary material for: HDAC inhibitor valproic acid protects heart function through Foxm1 pathway after acute myocardial infarction
Source: PubMed Central journal article supplement (PMC6354709; doi:10.1016/j.ebiom.2018.12.003), 2018-12-11

**Figure S1**

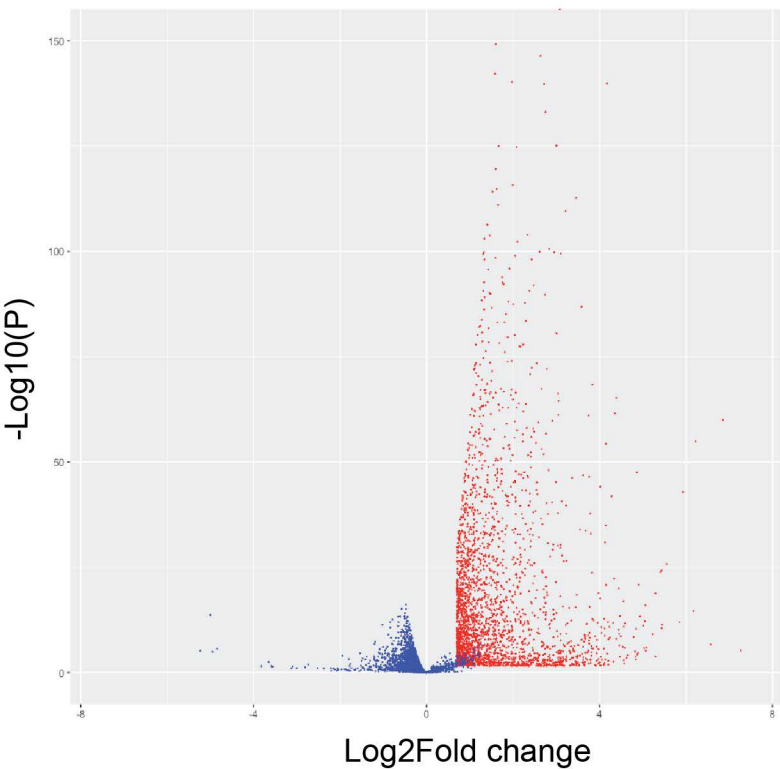

MI induced gene in red

VPA effect on all MI induced genes

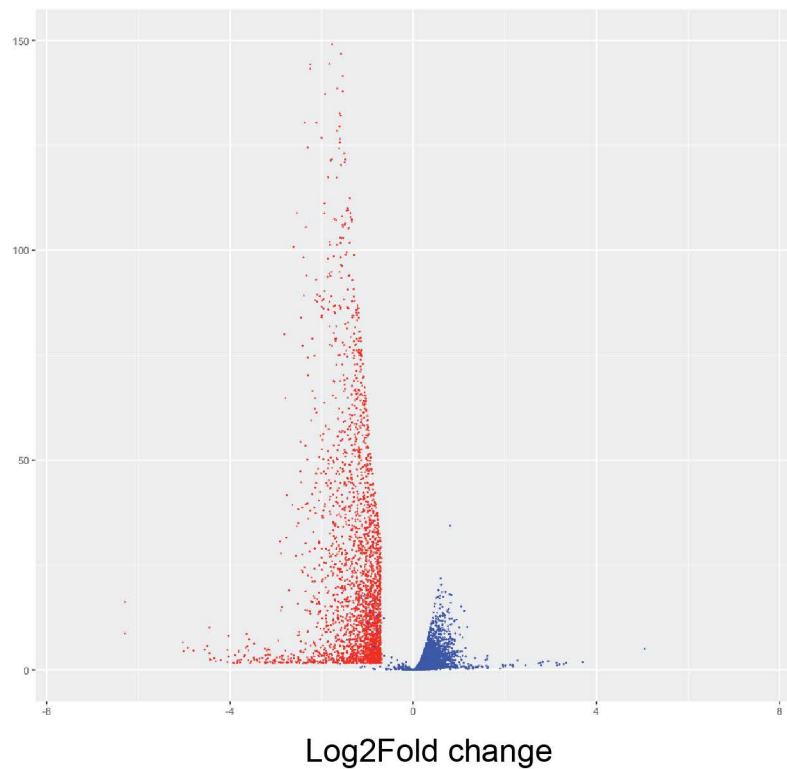

MI repressed gene in red

VPA effect on all MI repressed genes

Figure S2

a

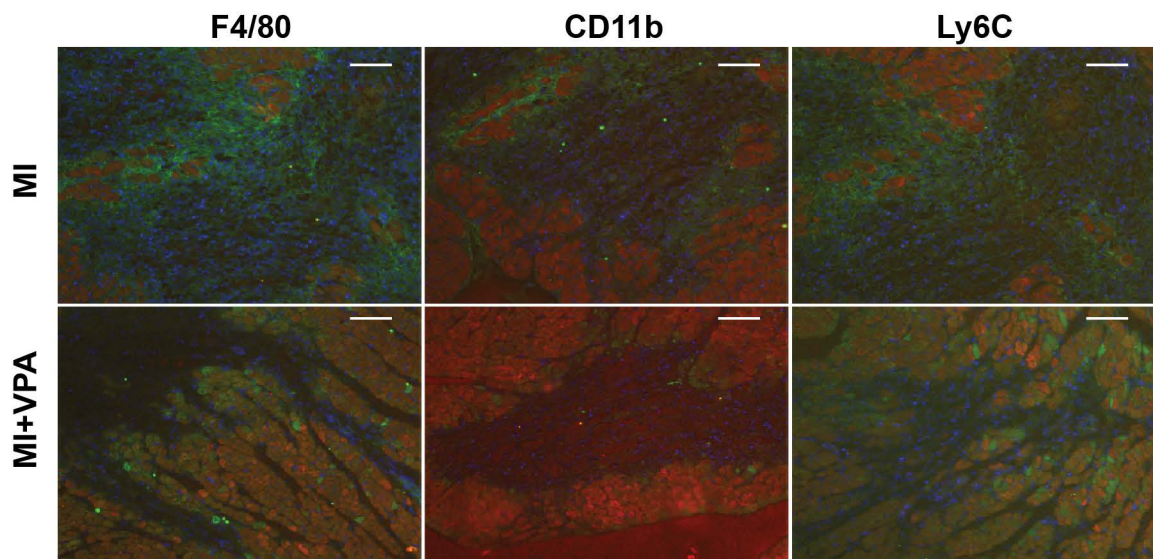

b

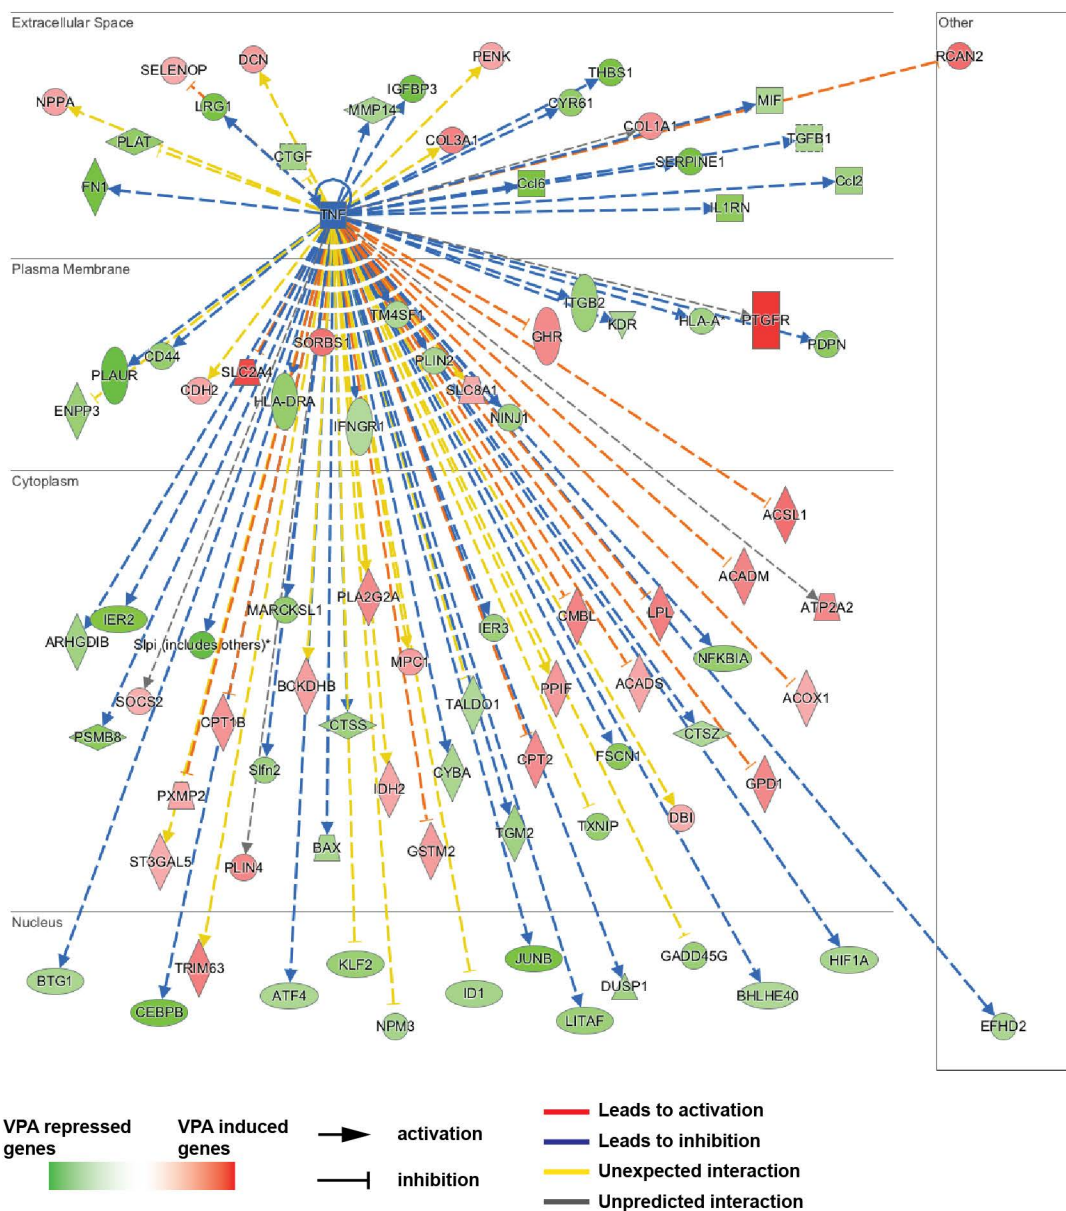

Figure S3

a

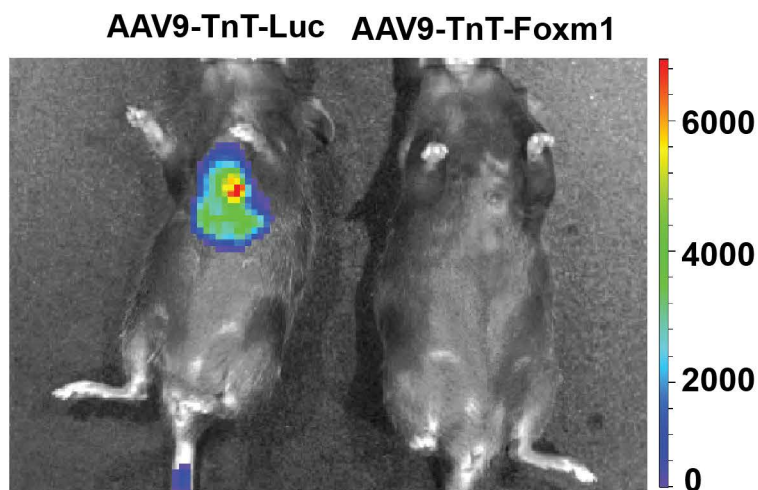

b

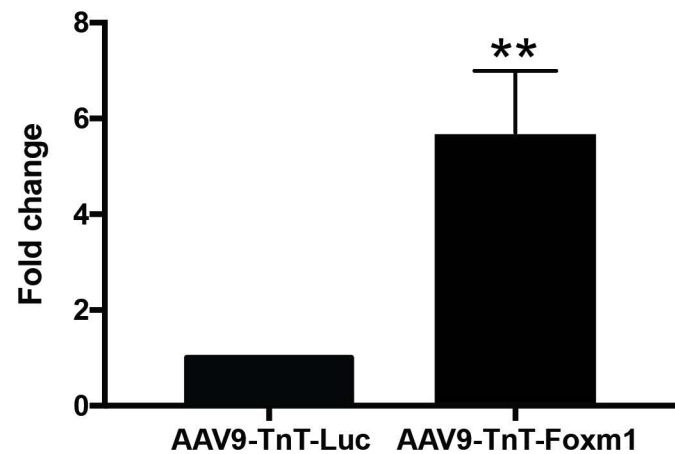

c

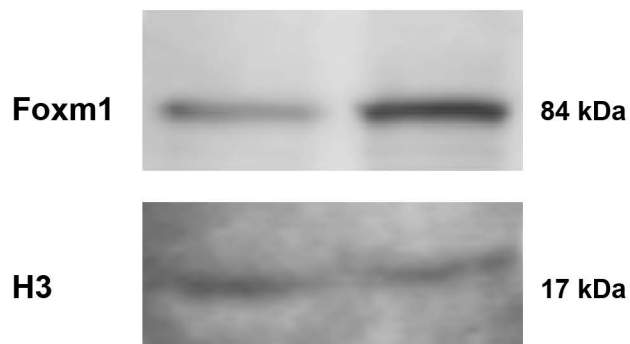

d

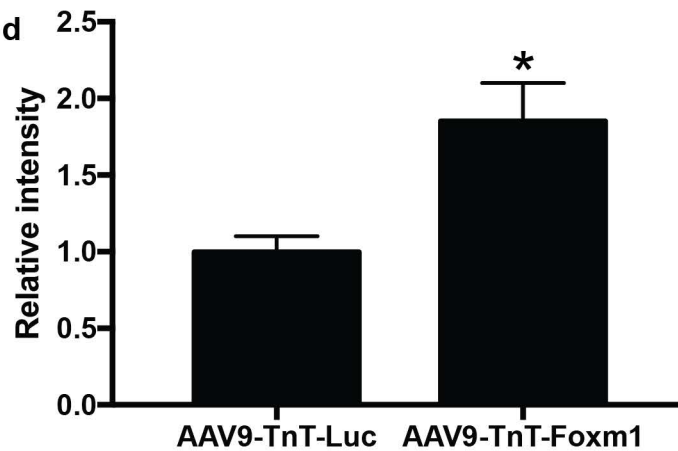

Figure S4

a

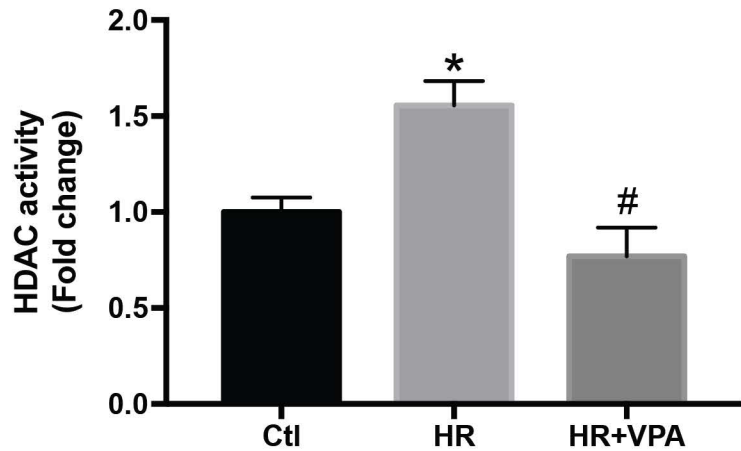

b

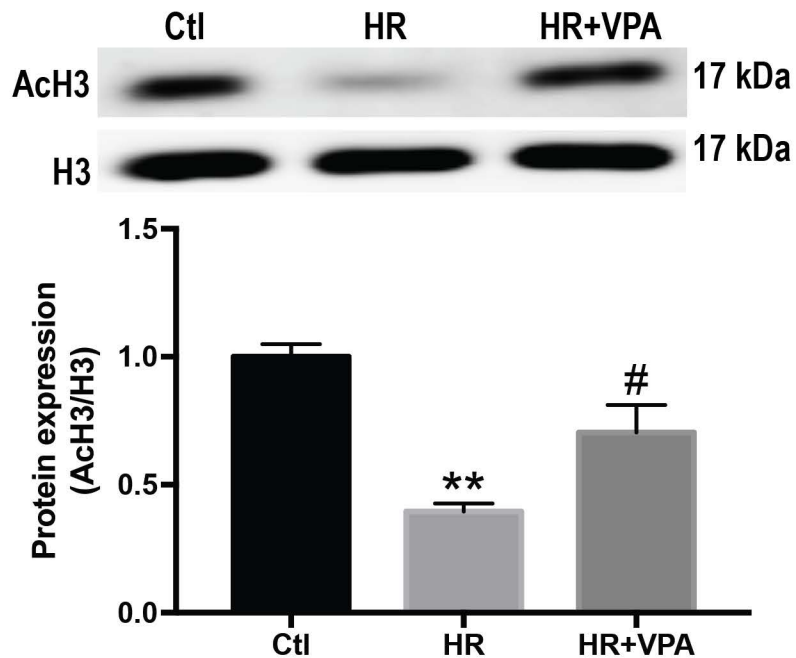

**Figure S5**

**a**

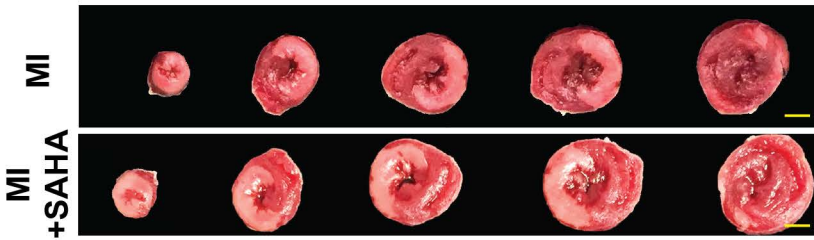

**b**

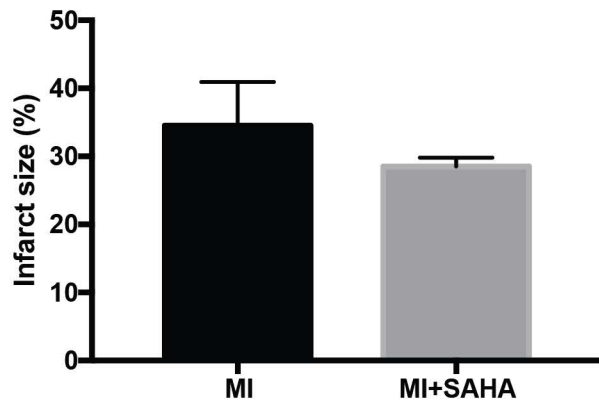

Supplement: mmc1.pdf [file mmc1.pdf]
